# Supplementary material for: A small viral potassium ion channel with an inherent inward rectification
Source: PubMed Central journal article supplement (PMC6527081; doi:10.1080/19336950.2019.1605813), 2019-04-22
Supplement: kchl-13-01-1605813-s001.pdf [file kchl-13-01-1605813-s001.pdf]

## Supplement

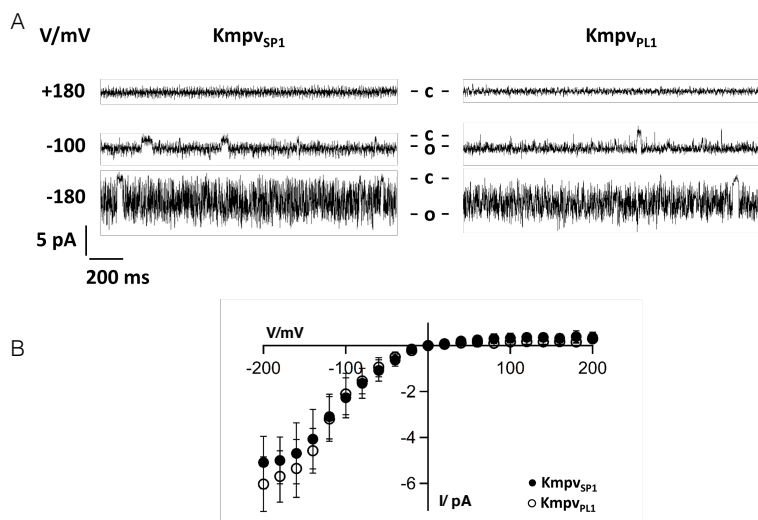

**Figure 1 supplement: Kmpv<sub>PL1</sub> has the same inward rectification as Kmpv<sub>SP1</sub>.** (A) Exemplar current traces of Kmpv<sub>PL1</sub> and Kmpv<sub>SP1</sub> activity over a range of clamp voltages in symmetrical KCl buffer (100 mM KCl + 10 mM HEPES, pH 7). Both channel proteins were translated *in vitro* as in Fig. 4. The Kmpv<sub>PL1</sub> channel exhibits the same high open probability with flicker type fluctuations as Kmpv<sub>SP1</sub>. (B) Mean I/V relations of average currents (mean  $\pm$  sd;  $n \geq 9$ ) of both channels measured over clamp steps of 60 sec.

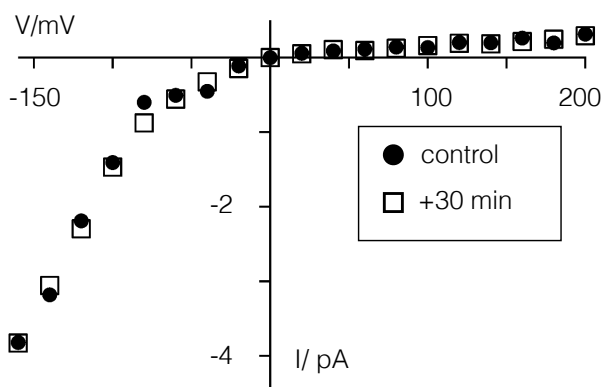

**Figure 2 supplement: Long term incubation of Kmpv<sub>SP1</sub> in pure KCl buffer does not compromise rectification.** I/V relation of mean currents measured in planar lipid bilayer with Kmpv<sub>SP1</sub> protein immediately after functional reconstitution (circles) and 30 min later (squares). Data were recorded as in Fig. 4.

```

KmpvSP1 -----
Kir1.1 MNASSRNVFDTLIRVLTESMFKHLRKWVTRFFGHSRQ-----RARLVSKDGRCNIE
Kir6.1 MLARKSIIPPEEYVLARIAAENLRKP-----RIRDRLP---KARFIAKSGACNLDA
Kir2.1 MGSVRT---NRYIVSSEEDGMKLATMAVANGFGNGKSKVRTRQQCRSRFVKKDGHCNVQ
Kir3.1 MSALRRKFGDDYQVVTSSSSGSLQ----PQGPQDPQQQLVPPKKRQRFVDKNGRCNVQ

KmpvSP1 -----MTPID---KFKLIVIV-----ALLYGFIYSRMDPEE
Kir1.1 FGNVEAQS-RFIFFDIWTTVLDLKWRYKMTIFITAFGLSWFFFGLLWYAVAYIHKDLPE
Kir6.1 HKNIREQG-RFL--QDIFTTLVDLKWRLTLVIFTMSFLCSWLLFAIMWWLVAFAGDIYA
Kir2.1 FINVGEKGRYL--ADIFTTCVDIRWRWMLVIFCLAFVLSWLLFFGCVLWLIALLHGDLD
Kir3.1 HGNLGSSETSRYL--SDLFTTLVDLKWRLNLFIFILTYTVAWLFMAMWWVIAYTRGDLNK
      * : * . : : : : : . *

KmpvSP1 F-----GFSSPLDPYYFSFTTMSVGYGDS--SPKTDRAKLLVMTQQ
Kir1.1 F-----HPSANHTPCVENINGLTS AFLFSLE TQVTIGYGFRCVTEQCATAIFLLIFQS
Kir6.1 YMEKSGMEKSGLESTVCVTNVR SFTSAFLFSIEVQVTIGFGGRMMTEECPLAITVLILQN
Kir2.1 S-----KEG---KACVSEVNSFTA AFLFSIE TQVTIGYGFRCVTD ECP IAVFMVVFQS
Kir3.1 A-----HVG-NYTPCVANVYNFP S AFLFFIE TEATIGYGYRYITDKCEP IILFLFQS
      . . . : * : . : : * : : . : : * .

KmpvSP1 V-----FIGGEIL-KLLMFKRKSK
Kir1.1 ILGVIINSFMCGAILAKISRPKKRAKTITFSKNAVISKRGGKLC LLIRVANLRKSLIGS
Kir6.1 IVGLIINAVMLGCIFMKTQAHRRAETLIFSRHAVIAVRNGKLCFMFRVGD LRKSMIISA
Kir2.1 IVGCIIDAFIIGAVMAKMAKP KKRNETLVF SHNAVIA MRDGKLC LMWRVGNLR KSHLVEA
Kir3.1 ILGSIVDAFLIGCMFIKMSQPKRAETLMFSEHAVISMRDGKLC LMFRVGNLRNSHMVSA
      : . : * : : * : . . * : : : : . . * . . : : : .

KmpvSP1 -----
Kir1.1 HIYGKLLKTTVTPEGETIILDQININFVVDAGNENLFFISPLTIYHVIDHNSPFFHMAAE
Kir6.1 SVRIQVVKTTTPEGEVVP IHQLDIPVDNPIESN NIFLVAPLIICHVIDKRSPLYDISAT
Kir2.1 HVRAQLLKSRTSEGEYIPLDQIDINVGF DSGIDRIFLVSPITIVHEIDEDSPLYDLSQ
Kir3.1 QIRCKLLKSRTPEGEFLPLDQLELDVGFSTGADQLFLVSPLTICHVIDAKSPFYDLSQR

KmpvSP1 -----
Kir1.1 TLLQQDFELVVFLDGTVESTSATCQVRTSYVPEEVLWG YRFAPIVSKTKEGKYRVD FHN
Kir6.1 DLANQDLEVIVILEGVVETTGITTOARTSYIAEEIQWGH R FVSIVTE-EEGVYSVDYSKF
Kir2.1 DIDNADFEIVVILEGMVEATAMTQCRSSYLANEILWGHRYEPV LFE-EKHYYKVDYSRF
Kir3.1 SMQTEQFEIVVILEGIVETTGMTQARTSYTEDEVLWGH R FFPVISL-EEGFFKVDYSQF

KmpvSP1 -----
Kir1.1 SKTVEVETPH-----
Kir6.1 GNTVKVAAPR-----
Kir2.1 HKTYEVPNTP-----
Kir3.1 HATFEVPTPPYSVKEQEEMLLMSPLIAPAITNSKERHNSVECLDGLDDITTKLPSKLOK

KmpvSP1 -----
Kir1.1 -----C-----AMCLYNEKDVRARMKRGYDNP---
Kir6.1 -----CSARELDEKPSILIQTLQKSEL SHQNSLRKRNSMRRNNSMRRNNSIRR
Kir2.1 -----LCSARDLAEKKYILSN-----ANSFCYENEVALTSKEEDDSENGVPE
Kir3.1 ITGREDFPKLLRMSSTTSEKAYSLGDLPMK LQRIS SVPGNSEEKLVSKTTKMLSDPMSQ

KmpvSP1 -----
Kir1.1 -----NFILSEVNETDDTKM
Kir6.1 NNSSLMVPKVQ-----FMTPEGNQNTSES
Kir2.1 STSTDTPPDID-----LHNQASVPLEPRPLRRESEI
Kir3.1 SVA-DLPPK LQKMAGGAARMEGNLPAKLRKMNSDRFT

```

**Figure 3 supplement: Viral inward rectifier shares no structural similarity with canonical Kir channels.** Alignment of Kmpv<sub>SP1</sub> with canonical Kir channels. The four major functional subgroups (Hibino et al., 2010) of Kir channels are represented by the human Kir1.1 (BAG36779.1), Kir2.1 (NP\_000211), Kir3.1 (P48549) and Kir6.1 (Q15842.1). Alignment performed with MUSCLE algorithm (<https://www.ebi.ac.uk/Tools/msa/muscle/>). Kir typical AAs are highlighted in the Kir2.1 sequence including: i) two Cys residues and charged AAs in the filter (in blue; Baronas and Kurata 2014), ii) the critical AA, which determines between weak and strong rectification (in green; Hiberio et al., 2010; Baronas and Kurata, 2014), iii) residues which induce strong rectification when an acidic substitution is introduced in Kir6.2 (in turquoise; Baronas and Kurata, 2014; Nichols and Lee, 2018), (iv) AAs for PIP<sub>2</sub> interaction (in red; Hiberio et al. 2010), (v) charged AAs on the wall of the cytoplasmic pore (in yellow; Fujiwara and Kubo 2006). Asterisks (\*) indicate conserved residues, colons (:) indicate residues with strongly similar properties, and periods (.) indicate residues with weakly similar properties.
